# Supplementary material for: Core–shell-structured CNT@hydrous RuO2 as a H2/CO2 fuel cell cathode catalyst to promote CO2 methanation and generate electricity
Source: Royal Society of Chemistry journal article supplement (doi:10.1039/d0ta11232a), 2021-01-01
Supplement: d0ta11232a1.pdf [file d0ta11232a1.pdf]

## Supporting Information

### **Core-shell-structured CNT@hydrous RuO<sub>2</sub> as a H<sub>2</sub>/CO<sub>2</sub> fuel cell cathode catalyst to promote CO<sub>2</sub> methanation and generate electricity**

**Jixiang Hu,<sup>a</sup> Ting Qu,<sup>a</sup> Yan Liu,<sup>a</sup> Xin Dai,<sup>a</sup> Qiang Tan,<sup>a</sup> Yuanzhen Chen,<sup>a</sup>  
Shengwu Guo<sup>a</sup> and Yongning Liu<sup>\*a</sup>**

<sup>a</sup> State Key Laboratory for Mechanical Behavior of Materials, Xi'an Jiaotong  
University, Xi'an, 710049, PR China

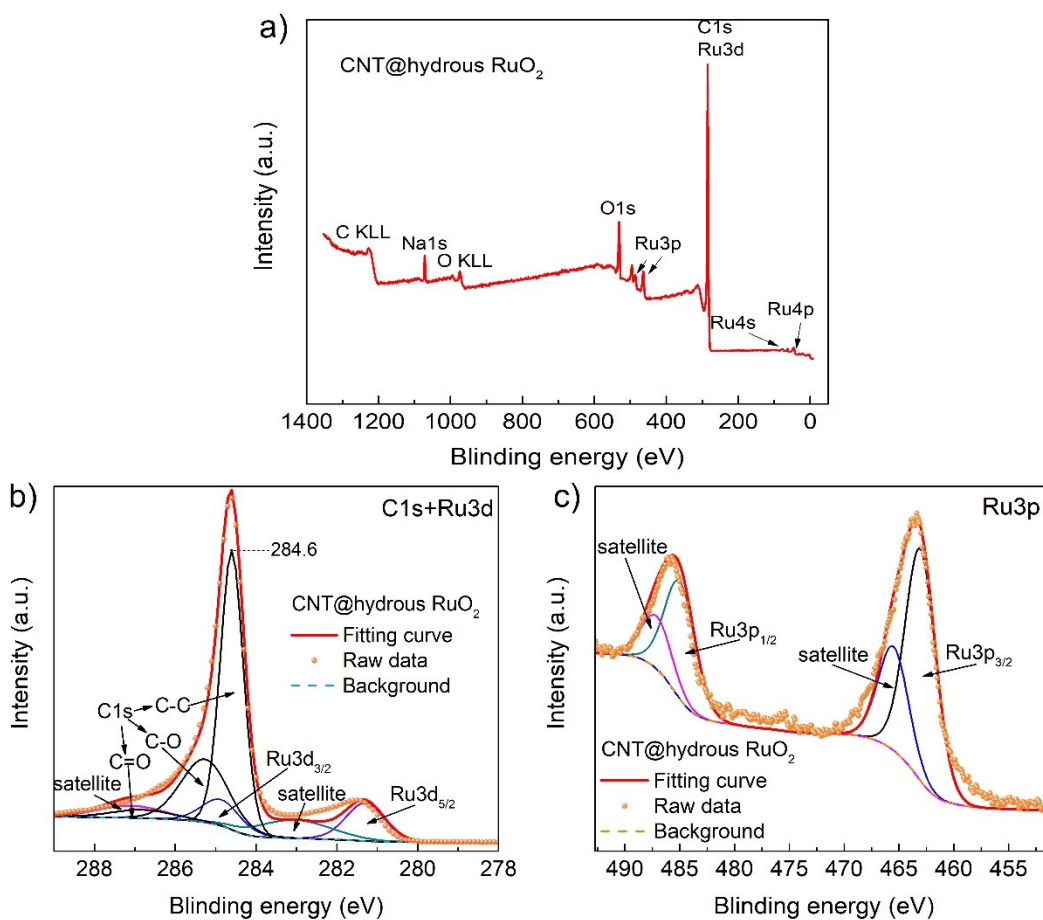

Fig. S1. (a) Survey XPS spectra of CNT@hydrous RuO<sub>2</sub>. (b) high-resolution spectra of XPS of CNT@hydrous RuO<sub>2</sub> for C 1s and Ru 3d. (c) high-resolution spectra of XPS of CNT@hydrous RuO<sub>2</sub> for Ru 3p.

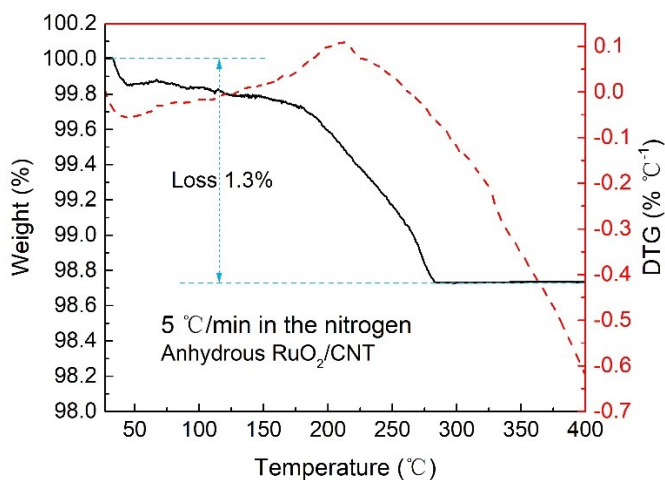

Fig. S2. TGA/DTG curves of anhydrous RuO<sub>2</sub>/CNT in the flowing nitrogen.

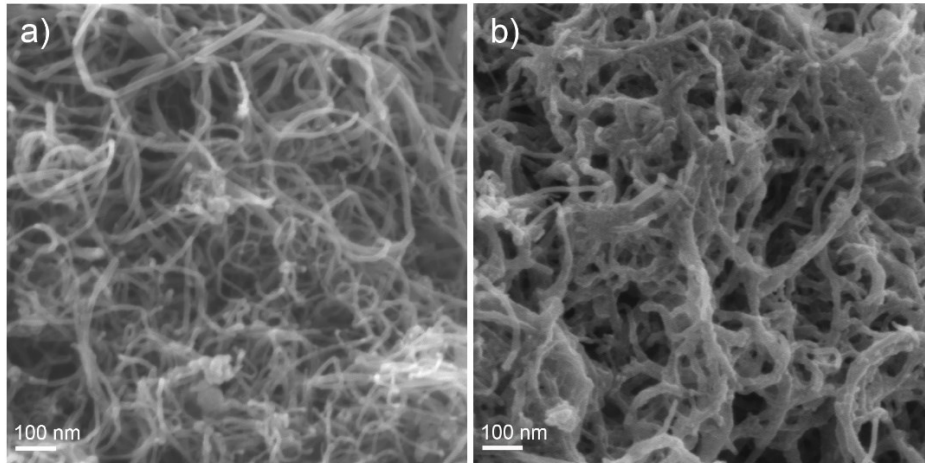

Fig. S3. (a) SEM images of acid-treated CNT. (b) SEM images of CNT@hydrous RuO<sub>2</sub>

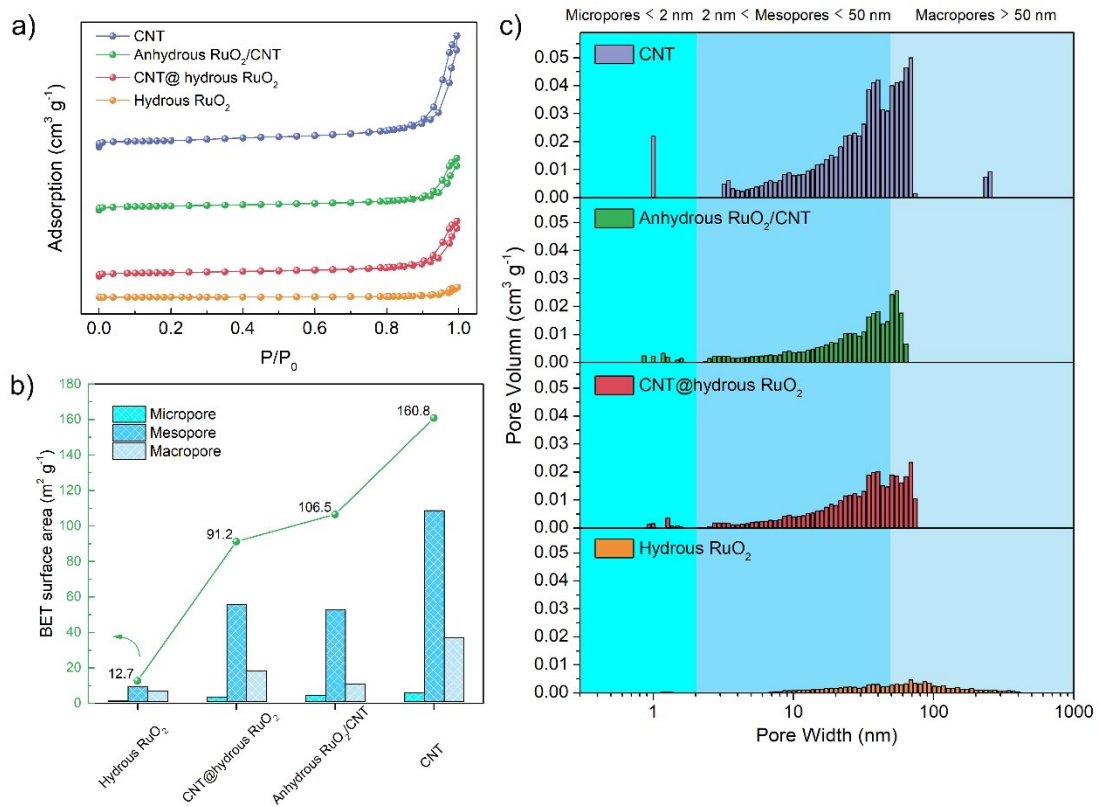

Fig. S4. (a) N<sub>2</sub> adsorption and desorption curves, (b) surface area and pore distribution plots, and (c) pore volume distribution graphs for hydrous RuO<sub>2</sub>, CNT@hydrous RuO<sub>2</sub>, anhydrous RuO<sub>2</sub>/CNT and CNT.

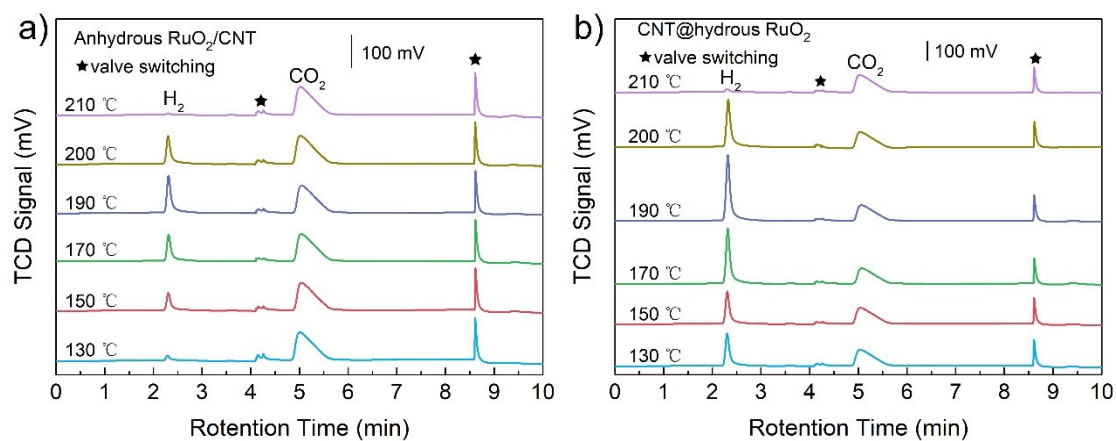

Fig. S5. TCD Spectra of Gas Chromatography at Different Temperatures. (a) Anhydrous RuO<sub>2</sub>/CNT as CO<sub>2</sub>RR catalyst. (b) CNT@hydrous RuO<sub>2</sub> as CO<sub>2</sub>RR catalyst.

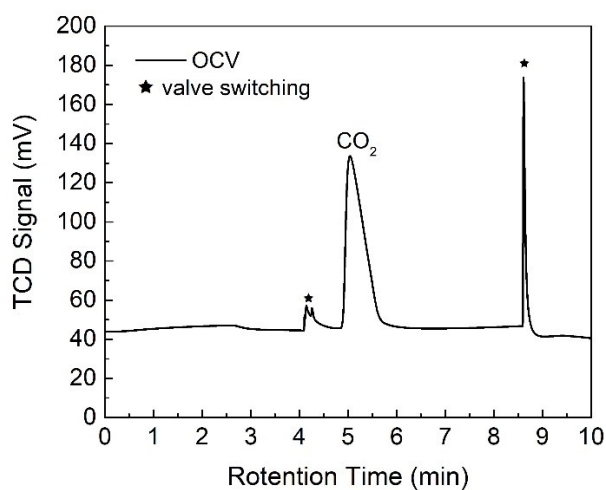

Fig. S6. The gas chromatography thermal conductivity detection (TCD) spectrum is obtained under open-circuit voltage (OCV).

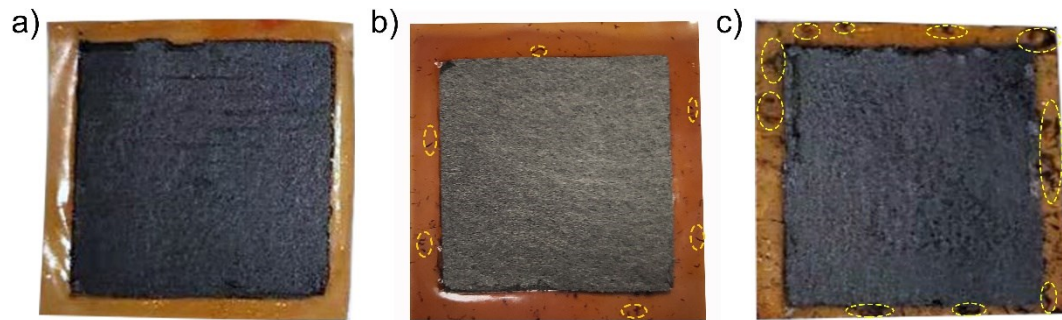

Fig. S7. Photo of MEA after testing battery in the different temperature range. (a) 130-190°C: MEA has no abnormalities. (b) 200°C: A few black spots on the membrane. (c) 210°C: A lot of dark spots on the membrane. the appearance of abnormal dark spots in the yellow dashed ellipse represents PBI membrane damage.

The generation rate of CH<sub>4</sub> ( $\gamma$ ) was calculated by the equation:

$$\gamma = \frac{u(\text{ml} / \text{min}) \times 60(\text{min} / \text{h}) \times c(\text{vol}\%) \times \rho(\text{mg} / \text{ml}) \times 1000}{M(\text{g} / \text{mol}) \times L(\text{g})}$$

$\gamma$ : methane generation rate,  $\text{umol} \cdot \text{g}_{\text{cat}}^{-1} \cdot \text{h}^{-1}$

$u$ : mass flow meter detects gas flow rate, ml/min

$c$ : Gas volume concentration detected by hydrogen flame ionization detector in gas chromatography, vol%.

$\rho$ : density of product CH<sub>4</sub>, 0.717 mg/ml.

$M$ : molar mass of CH<sub>4</sub>, 16 g/mol.

$L$ : cathode catalyst mass loading, g.

The transfer efficiency (TE) of gas products was calculated by the equation:

$$\left. \begin{array}{l} pV = nRT \\ TE = \frac{Q_{CO_2,RR}}{Q_{total}} = \frac{nzF}{It} \\ V = utc \end{array} \right\} \Rightarrow TE = \frac{puzFc}{RIT}$$

$$TE = \frac{p(N / m^2) \times u(\text{ml} / \text{min}) \times 10^{-6} \times z \times F(\text{C} / \text{mol}) \times c(\text{vol}\%)}{R[N \cdot m / (\text{mol} \cdot K)] \times I(\text{C} / \text{s}) \times 60(\text{s} / \text{min}) \times T(\text{K})}$$

$p$ : atmospheric pressure,  $1.013 \times 10^5 \text{ N/m}^2$ .

$u$ : mass flow meter detects gas flow rate, ml/min

$z$ : number of electrons transferred by electrode reaction.

$F$ : faradaic constant, 96485 C/ mol.

$c$ : Gas volume concentration detected by hydrogen flame ionization detector in gas chromatography, vol%.

$R$ : gas constant,  $8.314 \text{ N} \cdot \text{m} / (\text{mol} \cdot \text{K})$

$T$ : temperature, K.

$I$ : Discharge current of external circuit detected by battery test system. C/s.

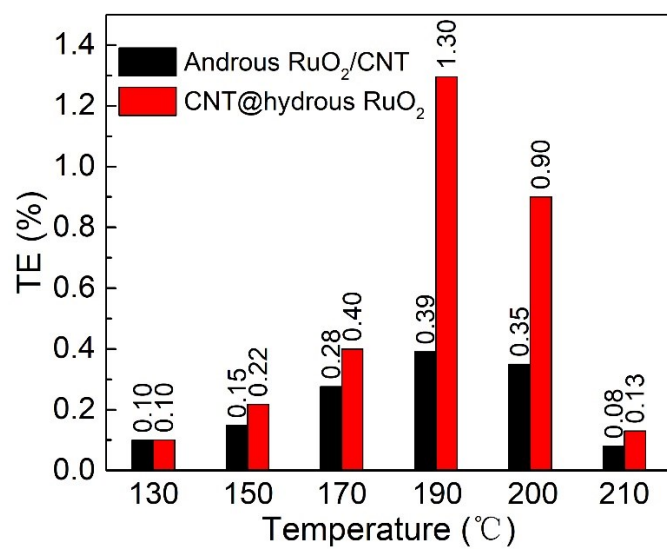

Fig. S8. TE at different temperatures is obtained under limit current discharge.
